# Supplementary material
Source: PubMed Central journal article supplement (PMC3213310)
Supplement: NIHMS296203-supplement-01.pdf [file NIHMS296203-supplement-01.pdf]

Table 3. Age and Race/Ethnicity Adjusted Relationships Between Systemic Factors and the Presence of a Nevus in the Multi-Ethnic Study of Atherosclerosis.

| Risk factor                              | All Racial/Ethnic Groups |           |           | Whites Only |           |          |
|------------------------------------------|--------------------------|-----------|-----------|-------------|-----------|----------|
|                                          | OR                       | 95% CI    | P value*† | OR          | 95% CI    | P value† |
| Age, per year*                           | 1.00                     | 0.98–1.02 | 0.99      | 1.00        | 0.98–1.02 | 0.82     |
| Gender, male vs female                   | 1.01                     | 0.71–1.43 | 0.96      | 0.91        | 0.61–1.36 | 0.65     |
| Race/ethnicity†                          |                          |           |           |             |           |          |
| Hispanic vs White                        | 0.28                     | 0.17–0.48 | <0.01     |             |           |          |
| Black vs White                           | 0.17                     | 0.09–0.31 | <0.01     |             |           |          |
| Chinese vs White                         | 0.10                     | 0.03–0.30 | <0.01     |             |           |          |
| Systolic blood pressure, per 10 mmHg     | 0.90                     | 0.82–0.99 | 0.04      | 0.93        | 0.83–1.04 | 0.17     |
| Diastolic blood pressure, per 10 mmHg    | 0.92                     | 0.77–1.10 | 0.36      | 0.96        | 0.79–1.18 | 0.72     |
| Hypertension, present                    | 0.66                     | 0.41–1.06 | 0.09      | 0.76        | 0.44–1.31 | 0.32     |
| Pack-years smoked                        | 1.00                     | 0.99–1.01 | 0.83      | 1.00        | 0.99–1.01 | 0.86     |
| Smoking status, current vs past/never    | 1.16                     | 0.69–1.96 | 0.58      | 1.25        | 0.68–2.29 | 0.47     |
| Alcohol use, current vs past/never       | 1.15                     | 0.79–1.68 | 0.47      | 0.92        | 0.59–1.44 | 0.72     |
| Alcohol use, per drink per week          | 0.99                     | 0.97–1.02 | 0.58      | 0.99        | 0.96–1.02 | 0.42     |
| Body mass index, per 5 kg/m <sup>2</sup> | 1.09                     | 0.93–1.28 | 0.29      | 1.10        | 0.91–1.33 | 0.34     |
| Glucose, per mg/dL                       | 1.00                     | 0.99–1.01 | 0.90      | 1.00        | 1.00–1.01 | 0.42     |
| Duration of diabetes‡, per year          | 1.00                     | 0.92–1.09 | 0.95      | 0.94        | 0.82–1.08 | 0.38     |
| Total homocysteine, per μmol/L           | 1.07                     | 0.59–1.96 | 0.82      | 1.37        | 0.71–2.66 | 0.35     |
| C-reactive protein, per mg/dL §          | 1.23                     | 1.06–1.43 | 0.01      | 1.27        | 1.07–1.52 | <0.01    |
| Plasmin-antiplasmin complex, per nM §    | 1.09                     | 0.67–1.76 | 0.73      | 1.12        | 0.64–1.96 | 0.69     |
| Interleukin-6, per pg/mL §               | 1.26                     | 0.97–1.64 | 0.09      | 1.28        | 0.94–1.73 | 0.12     |
| CD40 ligand, per pg/mL §                 | 1.73                     | 0.82–3.63 | 0.15      | 1.65        | 0.78–3.51 | 0.19     |
| E-selectin, per ng/mL §                  | 1.34                     | 0.47–3.88 | 0.58      | 1.36        | 0.45–4.10 | 0.59     |
| Interleukin-2, per pg/mL §               | 0.62                     | 0.15–2.51 | 0.50      | 0.49        | 0.12–2.10 | 0.34     |
| Matrix metalloproteinase 3, per ng/mL §  | 1.44                     | 0.72–2.88 | 0.30      | 1.52        | 0.76–3.06 | 0.24     |
| Matrix metalloproteinase 9, per ng/mL §  | 1.16                     | 0.47–2.86 | 0.75      | 0.99        | 0.38–2.57 | 0.99     |
| Tumor necrosis factor, per pg/mL §       | 0.95                     | 0.12–7.33 | 0.96      | 0.92        | 0.11–7.85 | 0.94     |
| Soluble TF, per pg/mL                    | 0.99                     | 0.50–1.95 | 0.98      | 0.98        | 0.49–1.97 | 0.96     |
| TAFI, per μg/mL                          | 1.05                     | 0.76–1.46 | 0.76      | 1.07        | 0.76–1.49 | 0.71     |
| TFPI, per ng/mL                          | 0.98                     | 0.95–1.01 | 0.25      | 0.98        | 0.95–1.02 | 0.35     |
| Microalbuminuria, present                | 0.68                     | 0.33–1.39 | 0.29      | 0.95        | 0.44–2.09 | 0.91     |
| sICAM, per ng/mL ¶                       | 1.00                     | 0.99–1.00 | 0.43      | 1.00        | 0.99–1.00 | 0.12     |
| von Willebrand factor, per 1%            | 0.99                     | 0.98–1.00 | 0.13      | 0.99        | 0.98–1.00 | 0.11     |
| Serum total cholesterol, per 10 mg/dL    | 1.03                     | 0.99–1.08 | 0.17      | 1.04        | 0.98–1.09 | 0.20     |
| HDL cholesterol, per 10 mg/dL            | 1.00                     | 0.89–1.12 | 1.00      | 1.05        | 0.93–1.19 | 0.47     |
| LDL cholesterol, per 10 mg/dL            | 1.03                     | 0.98–1.10 | 0.24      | 1.03        | 0.96–1.10 | 0.39     |
| Triglycerides, per 40 mg/dL              | 1.05                     | 1.00–1.11 | 0.07      | 1.04        | 0.97–1.11 | 0.27     |

Abbreviations: OR = odds ratio; CI = confidence interval; TF = tissue factor; TAFI = thrombin-activable fibrinolysis inhibitor; TFPI = tissue factor pathway inhibitor; sICAM = soluble intercellular adhesion molecule; HDL = high density lipoprotein; LDL = low density lipoprotein.

\* Adjusted for race/ethnicity

† Adjusted for age

‡ In persons with diabetes (N=492)

§ Measured on logarithmic scale

|| Measured in random sample (N=924, 15.0% of cohort)

¶ Measured in random sample (N=2431)
